# Supplementary material
Source: HighWire-hosted journal article supplement (https://jnm.snmjournals.org/highwire/filestream/95573/field_highwire_adjunct_files/0/233122_Supplemental_Data.pdf)
Supplement: 233122_Supplemental_Data.pdf [file 233122_Supplemental_Data.pdf]

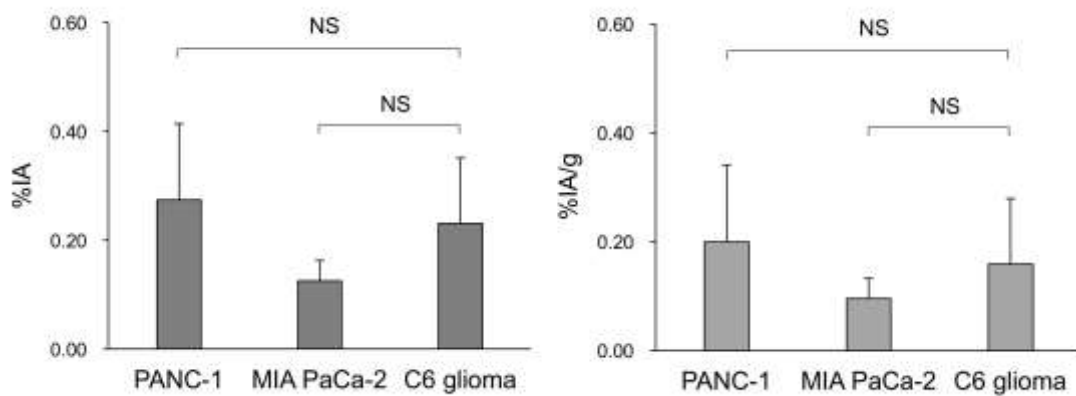

**Supplemental Figure 1.** *In vitro* cellular uptake assay of  $^{64}\text{Cu}$ -FAPI-04 using PANC-1, MIA PaCa-2, and C6 glioma cells for comparison. We observed minimal accumulation in PANC-1 and MIA PaCa-2 cells, with this comparable to that in C6 glioma cells (negative control). Data represent the mean ( $\pm$ SE), percent injected activity (%IA), and percent injected activity per gram (%IA/g).

NS: not significant according to Mann–Whitney *U* test.

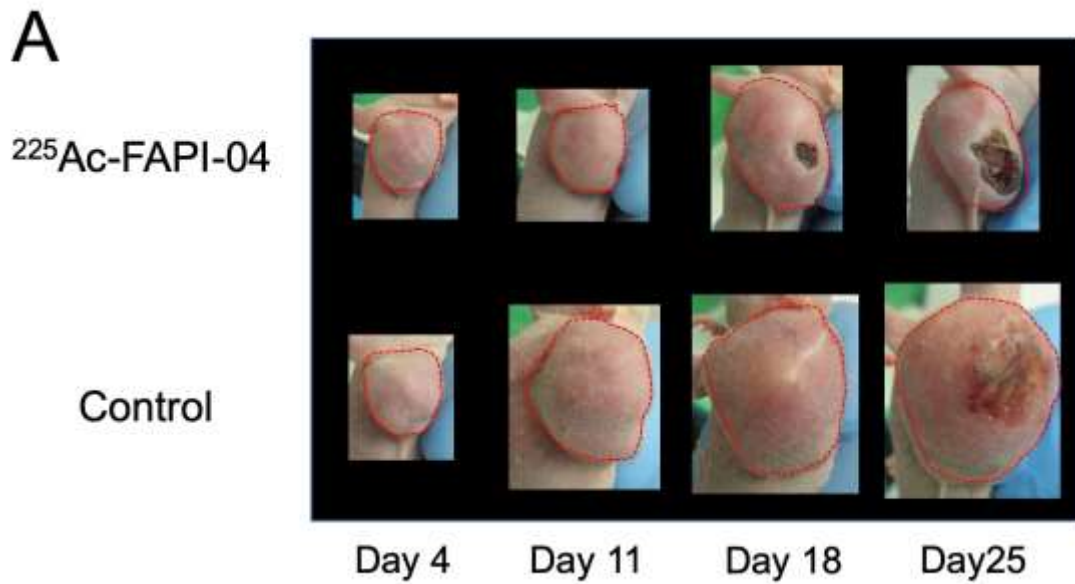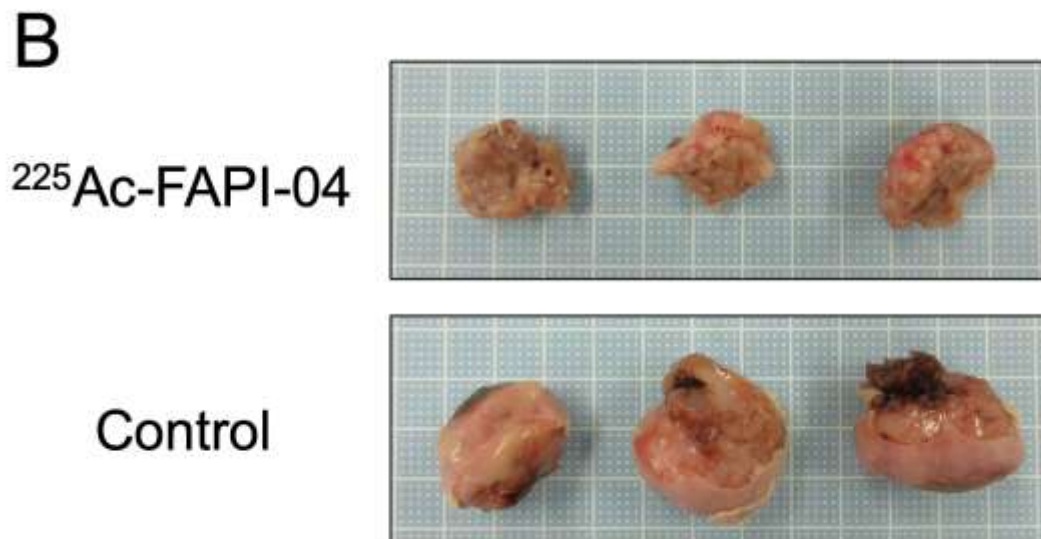

**Supplemental Figure 2.** (A) Appearance of the xenografts after injection of  $^{225}\text{Ac}$ -FAPI-04 and control. A dark-brown scab was observed on the surface of the xenograft at day 18 and

accompanied by mild tumor shrinkage in mice injected with  $^{225}\text{Ac}$ -FAPI-04. (B) Tumor appearance after resection at day 31 (2<sup>nd</sup> cohort), with tumor size smaller in  $^{225}\text{Ac}$ -FAPI-04-injected mice relative to that observed in control mice.
